# Supplementary material
Source: MDPI journal article supplement (https://www.mdpi.com/1996-1073/10/11/1813)
Supplement: s1 [file s1]

Supplementary Materials: Band Gap Tuning of Cu2ZnGeSxSe4-x Absorbers for Thin-Film Solar Cells

Thomas Schnabel *, Mahmoud Seboui and Erik Ahlswede

|  | 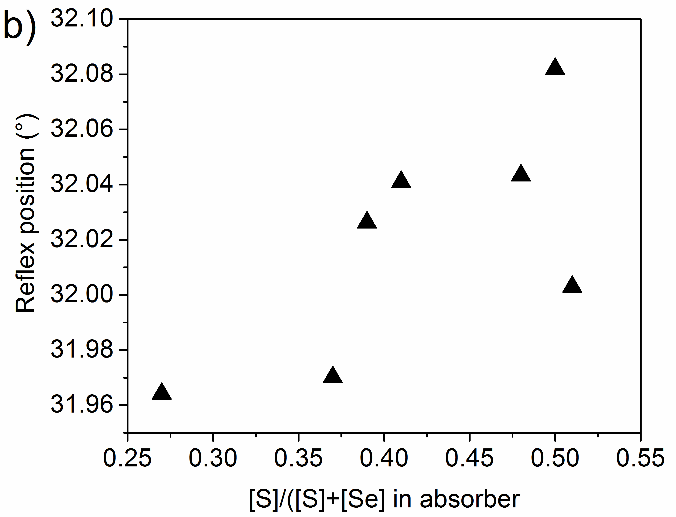 |
| --- | --- |

**Figure S1.** Detailed view of the MoSxSe2-x 100-reflection (**a**) with the reference positions for MoSe2 (JCPDS 065-3481) and MoS2 (JCPDS 37-1492) and the fitted reflection position versus the [S]/([S] + [Se]) ratio of the CZGSSe absorber (**b**). The position of the reflection is slightly shifted to higher diffraction angles with an increased S-incorporation into the absorber, while the intensity declines due to a reduced MoSxSe2-x layer thickness.


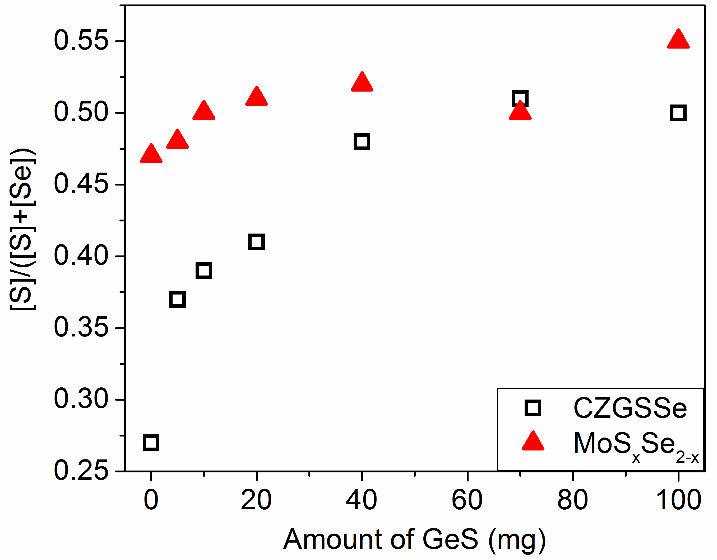


**Figure S2.** The [S]/([S] + [Se]) ratio of the CZGSSe absorber and the MoSxSe2-x layer as determined from the XRD measurements according to Vegard’s law. For the calculation the 100 reflection positions of MoS2 (JCPDS 00-37-1492) and MoSe2 (JCPDS 03-065-3481) were used as reference and the shift of the Mo 110 reflection was corrected according to JCPDS 01-089-5156.


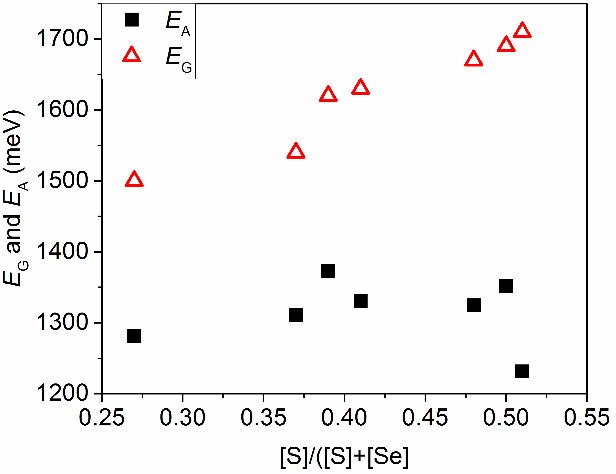


**Figure S3.** Band gap and activation energy of the dominant recombination path for CZGSSe solar cells with different [S]/([S] + [Se]) ratios. The band gap *E*G was estimated by EQE, while the activation energy *E*A was determined from the extrapolation of *V*OC to 0 K. The temperature-dependent measurement of JV-characteristics was carried out in a temperature range between 5 and 65 °C.


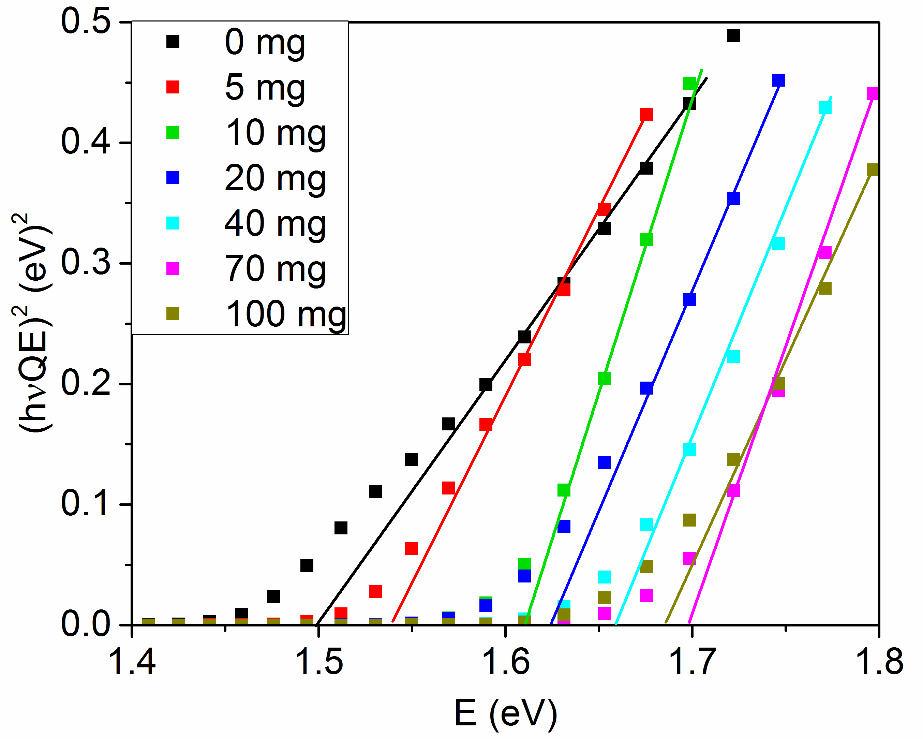


**Figure S4.** Plot of the squared quantum efficiency versus the energy to estimate the band gaps for CZGSSe absorbers that were processed in the presence of different amounts of GeS. Colored lines have been added as a guide to the eye.

| 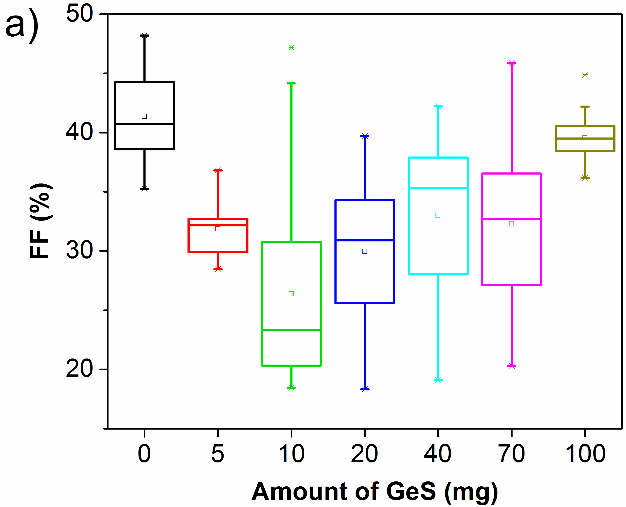 | 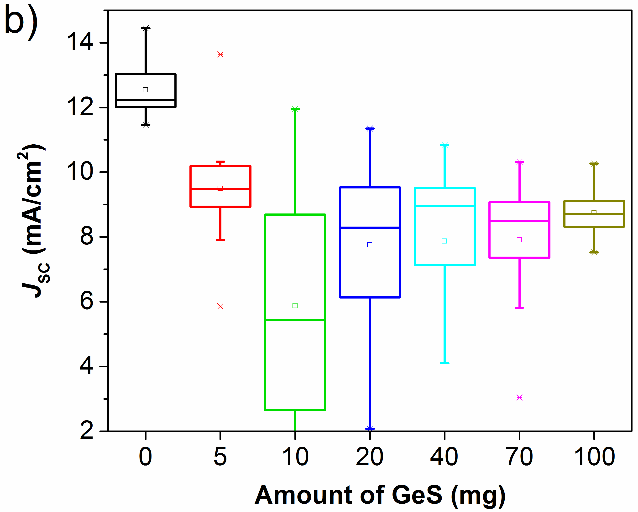 |
| --- | --- |

**Figure S5.** Box plots of fill factor (**a**) and short-circuit current density (**b**) of solar cells fabricated from CZGSSe absorbers that were annealed in the presence of different amounts of GeS.

| 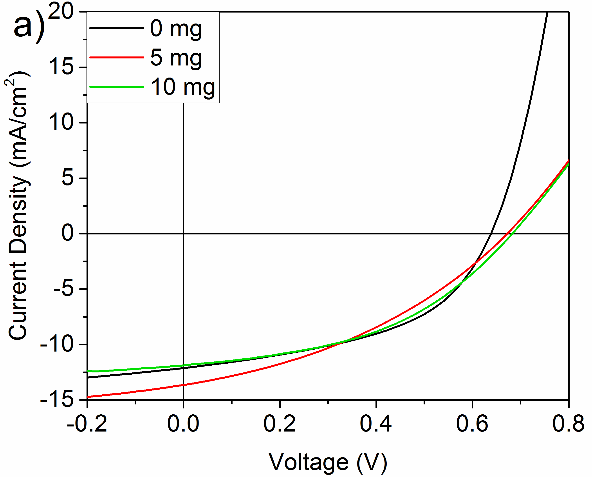 | 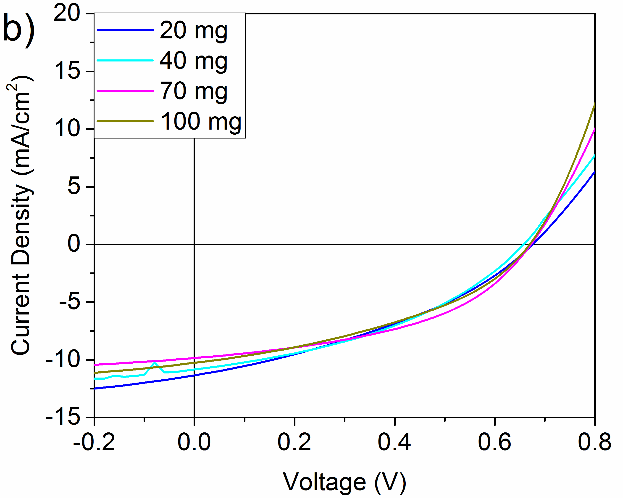 |
| --- | --- |

**Figure S6.** JV-characteristics under illumination of solar cells processed from samples that were annealed in the presence of 0–10 mg GeS (**a**) and 20–100 mg GeS (**b**).

© 2016 by the authors; licensee MDPI, Basel, Switzerland. This article is an open access article distributed under the terms and conditions of the Creative Commons by Attribution (CC-BY) license (http://creativecommons.org/licenses/by/4.0/).
